# Supplementary material for: Seborrheic Dermatitis Is Related to Motor Symptoms in Parkinson’s Disease
Source: PubMed Central journal article supplement — J Clin Neurol. 2022 Jul 14;18(6):628–34. doi: 10.3988/jcn.2022.18.6.628 (PMC9669556; doi:10.3988/jcn.2022.18.6.628), 2022-07-14
Supplement: jcn-18-628-s001.pdf [file jcn-18-628-s001.pdf]

**Supplementary Table 1.** Difference in age, sex, disease duration, UPDRS III, NMSQ, PDSS, SCOPA-AUT, and LEDD in regard to seborrheic dermatitis

| Parameter             | Seborrheic dermatitis |               | U     | Z      | p                  |
|-----------------------|-----------------------|---------------|-------|--------|--------------------|
|                       | Yes                   | No            |       |        |                    |
| Age (yr)              | 72 (64–80)            | 68 (60–72)    | 287   | -1.901 | 0.057*             |
| Sex (female:male)     | 5:17                  | 17:22         | -     | -      | 0.103 <sup>†</sup> |
| Disease duration (yr) | 7 (3.5–11.5)          | 6 (3–10)      | 392.5 | -0.264 | 0.791*             |
| UPDRS III             | 20 (14.5–26)          | 14 (9–21)     | 272   | -2.134 | 0.033*             |
| SCOPA-AUT             | 14 (7.5–21.5)         | 14 (9–25)     | 375.5 | -0.512 | 0.609*             |
| LEDD (mg)             | 550 (270–744.5)       | 570 (400–860) | 370   | -0.612 | 0.540*             |
| NMSQ                  | 9.52±5.66             | 9.77±5.69     | -     | -      | 0.874 <sup>†</sup> |
| PDSS                  | 105.98±29.95          | 95.48±30.94   | -     | -      | 0.208 <sup>†</sup> |

Data are *n*, mean±standard-deviation or median (IQR) values.

\*Mann-Whitney U test; <sup>†</sup>Student's *t*-test; \*Chi-square test.

IQR, interquartile range; LEDD, levodopa-equivalent daily dose; NMSQ, Non-Motor Symptoms Questionnaire; PDSS, Parkinson's Disease Sleep Scale; SCOPA-AUT, Scales for Outcomes in Parkinson's Disease-Autonomic Dysfunction; UPDRS III, Unified Parkinson's Disease Rating Scale part III.
